# Supplementary material
Source: MDPI journal article supplement (https://www.mdpi.com/2076-3298/9/12/148)
Supplement: s1 [file s1]

# Greenspaces and human well-being: Perspectives from a rapidly urbanising low-income country

## Supplementary material

### S1. Study population

The sample frame for this study (for the household survey) builds on two previous studies from Nepal. The SUE study, which assessed mental health of urban dwellers in Kathmandu (Elsey *et al.*, 2018) and a study that assessed the pathways linking greenspaces and mental health in Kathmandu district (Nawrath *et al.*, 2021). The study population were adults over 18 years who reside in 1) Bansighat Squatter Community in Teku/Thapathali and in 2) Jorpati in Gokarneshwor municipality, both in Kathmandu district.

**Table S1.** Sociodemographic characteristics of participants in the household survey (N = 358).

|            | Variable                        | N   | %     |
|------------|---------------------------------|-----|-------|
| Gender     | Female                          | 128 | 35.75 |
|            | Male                            | 230 | 64.25 |
|            | In another way                  | 0   | 0     |
| Age        | Under 18                        | 1   | 0.28  |
|            | 18-29                           | 106 | 29.61 |
|            | 30-39                           | 107 | 29.89 |
|            | 40-49                           | 73  | 20.40 |
|            | 50-59                           | 45  | 12.57 |
|            | 60-69                           | 19  | 5.31  |
|            | 70 and over                     | 7   | 1.96  |
| Caste      | Hill Brahmin                    | 103 | 28.77 |
|            | Hill Chhetri                    | 53  | 14.80 |
|            | Terai Brahmin/Chhetri           | 17  | 4.75  |
|            | Hill Dalit                      | 14  | 3.91  |
|            | Terai Dalit                     | 1   | 0.28  |
|            | Newar                           | 70  | 19.55 |
|            | Hill Janajati                   | 59  | 16.48 |
|            | Terai Janajati                  | 1   | 0.28  |
|            | Muslim                          | 35  | 9.77  |
|            | Other                           | 10  | 2.79  |
|            | I don't know                    | 0   | 0     |
| Employment | Labour (skilled)                | 16  | 4.47  |
|            | Labour (unskilled)              | 4   | 1.12  |
|            | Service (government)            | 13  | 3.63  |
|            | Service (private)               | 47  | 13.13 |
|            | Petty business                  | 39  | 10.89 |
|            | Business                        | 124 | 34.64 |
|            | Farming (agriculture/livestock) | 9   | 2.51  |
|            | Homemaker                       | 29  | 8.10  |
|            | Student                         | 43  | 12.01 |

|                               |    |      |
|-------------------------------|----|------|
| Retired (pension)             | 1  | 0.28 |
| Unemployment (able to work)   | 12 | 3.35 |
| Unemployment (unable to work) | 5  | 1.40 |
| Others                        | 15 | 4.19 |
| I don't know                  | 1  | 0.28 |

### *S1.1. Criteria for participant selection and sample size*

We selected study respondents to represent a balance of gender (50% male, 50% female), adults of all age groups, and varying income levels and caste affiliations. The study population in Bansighat Squatter Community represents low socio-economic status, while the population of Jorpati is characterised by higher socio-economic status.

**Table S2.** Criteria for participant selection.

| <b>Criteria for participant selection</b>                                                                    | <b>Study population for household survey 1 (Bansighat)</b> | <b>Study population for household survey 2 (Jorpati)</b> |
|--------------------------------------------------------------------------------------------------------------|------------------------------------------------------------|----------------------------------------------------------|
| <b>Balance of genders (50 % male/ 50 % female)</b>                                                           | yes                                                        | yes                                                      |
| <b>Adults of 4 age groups</b>                                                                                | yes                                                        | yes                                                      |
| <b>Varying income levels (indicated through employment type and status of chief household income earner)</b> | At the lower end of the socio-economic spectrum            | At the higher end of the socio-economic spectrum         |
| <b>Varying caste affiliation depending on the caste composition of the neighbourhood</b>                     | yes                                                        | yes                                                      |

**Table S3.** Age groups.

| <b>Age groups</b> | <b>Years</b> |
|-------------------|--------------|
| 1                 | 18-29        |
| 2                 | 30-39        |
| 3                 | 40-49        |
| 4                 | 50-59        |
| 5                 | 60-69        |
| 6                 | 70 and over  |

**Table S4.** Sample size.

|                         | <b>Bansighat</b>               | <b>Jorpati</b>                 |
|-------------------------|--------------------------------|--------------------------------|
| <b>Survey pilot</b>     | 5–10                           | 5–10                           |
| Age                     | 18–40 (2–5), >40 (2–5)         | 18–40 (2–5), >40 (2–5)         |
| Gender                  | Female (2–5), male (2–5)       | Female (2–5), male (2–5)       |
| <b>Household survey</b> | 150–200                        | 150–200                        |
| Age                     | 18–40 (75–100), >40 (75–100)   | 18–40 (75–100), >40 (75–100)   |
| Gender                  | Female (75–100), male (75–100) | Female (75–100), male (75–100) |

*S1.2. Criteria for participant selection and sample size***Inclusion criteria**

- Adults > 18 who provide informed consent
- Appropriate mental or physical state to participate in the study (i.e. not too ill, under the influence of any substances or aggressive)
- Adults of all age groups (4 age groups)
- Varying income levels (indicated through employment type and status of chief household income earner)
- Varying caste affiliations depending on the caste composition of neighbourhood

**Exclusion Criteria**

- Underaged persons
- Those who were not willing to participate and who were not able to respond were excluded from the study

**S3. Results****Table S5.** Outcome summary of explanatory variables (N=358).

| <b>Greenspace use</b>      |                            |                         |                            |                   |              |           |
|----------------------------|----------------------------|-------------------------|----------------------------|-------------------|--------------|-----------|
| <i>3–4 times per month</i> | <i>1–2 times per month</i> | <i>Every 2–3 months</i> | <i>Once/twice per year</i> | <i>Less often</i> | <i>Never</i> | <i>NA</i> |
| 147 (41.06)                | 86 (24.02)                 | 47 (13.13)              | 27 (7.54)                  | 39 (10.90)        | 11 (3.07)    | 1 (0.28)  |

| <b>Greenspace distance</b>                 |                       |                                   |                              |                          |
|--------------------------------------------|-----------------------|-----------------------------------|------------------------------|--------------------------|
| <i>5-10 min walk</i>                       | <i>11-20 min walk</i> | <i>21-30 min walk</i>             | <i>More than 30 min walk</i> | <i>NA</i>                |
| 129 (36.03)                                | 111 (31.01)           | 61 (17.04)                        | 29 (8.10)                    | 28 (7.8)                 |
| <b>Greenspace experience as a child</b>    |                       |                                   |                              |                          |
| <i>Strongly agree</i>                      | <i>Agree</i>          | <i>Neither agree nor disagree</i> | <i>Disagree</i>              | <i>Strongly disagree</i> |
| 207 (57.82)                                | 114 (31.84)           | 25 (6.98)                         | 11 (3.07)                    | 1 (0.28)                 |
| <b>Greenspace experience as a teenager</b> |                       |                                   |                              |                          |
| 169 (47.21)                                | 136 (37.99)           | 39 (10.89)                        | 13 (3.63)                    | 1 (0.28)                 |
| <b>Greenspace importance</b>               |                       |                                   |                              |                          |
| 202 (46.42)                                | 135 (37.71)           | 17 (4.75)                         | 3 (0.84)                     | 1 (0.28)                 |
| <b>Noticing nature</b>                     |                       |                                   |                              |                          |
| <i>A great deal (5)</i>                    | <i>(4)</i>            | <i>Somewhat (3)</i>               | <i>(2)</i>                   | <i>Not much (1)</i>      |
| 161 (44.97)                                | 108 (30.17)           | 62 (17.32)                        | 12 (3.35)                    | 14 (3.91)                |

#### S4. Questionnaire

Q1 Consent to participate in research

You are being invited to participate in a study to understand how urban environments affect people's well-being. This study is being done by Max Nawrath, Helen Elsey and Martin Dallimer from the University of Leeds in the UK and by Moti Rijal from the Tribhuvan University Kathmandu in Nepal. The questionnaire will take you approximately 12 minutes to complete. Your participation in this study is entirely voluntary and you can withdraw at any time up to July 2022. You do not have to answer any questions you do not want to. We believe there are no known risks associated with this research study; however, as with any online related activity the risk of a breach is always possible. To the best of our ability your participation in this study will remain confidential, and only anonymised data will be published. We will minimise any risks by following the Nepal Right to Information Act 2007. Further information is available via the University of Leeds Privacy Notice.

I confirm I have read and understood the Participant Information Sheet. I understand that my participation is voluntary and that I am free to withdraw at any time without giving any reason.

I agree to take part in this research project.

☐ Yes (1)

☐ No (2)

Q2 How old are you?

☐ Under 18 (1)

☐ 18-29 (2)

☐ 30-39 (3)

☐ 40-49 (4)

☐ 50-59 (5)

☐ 60-69 (6)

☐ 70 and over (7)

☐ 75 - 84 (8)

Q3 How would you describe your gender?

☐ Male (1)

☐ Female (2)

☐ In another way (3)

Q4 Which caste do you belong to?

☐ Hill Brahmin (1)

☐ Hill Chhetri (2)

☐ Terai Brahmin/Chhetri (3)

☐ Hill Dalit (4)

☐ Terai Dalit (5)

☐ Newar (6)

☐ Hill Janajati (7)

☐ Terai Janajati (8)

☐ Muslim (9)

☐ Others (10)

☐ I don't know (11)

Q5 Now, thinking of the chief income earner in your household (which might be you or somebody else in the household) which of these best describes the current status of the chief income earner?

- ☐ Homemaker/housewife or househusband (1)
- ☐ Student/full time education (2)
- ☐ Retired (3)
- ☐ Unemployed (4)
- ☐ Factory/manual worker (5)
- ☐ Crafts/tradesperson/skilled worker (6)
- ☐ Office/clerical/administration (7)
- ☐ Middle management (8)
- ☐ Senior management (9)
- ☐ Professional (10)

**Q6 For the following question, imagine yourself in a nearby greenspace at this time of year. Greenspaces include all forms of living nature of flora and fauna in cities, including maintained and unmaintained environmental areas such as nature reserves, wilderness environments and urban parks. Please think about the living things, including the plants, fungi and animals (but not pets, horses, cows, sheep), in that greenspace.**

**Q7 What is the nearby greenspace that you are thinking about like?**

Please indicate the level of each element you believe that greenspace contains at this time of year.  
Select one option per row.

Remember, there are no right or wrong answers.

|                               | Low (1)               | Medium (2)            | High (3)              |
|-------------------------------|-----------------------|-----------------------|-----------------------|
| The variety of sounds<br>(1)  | <input type="radio"/> | <input type="radio"/> | <input type="radio"/> |
| The variety of colours<br>(2) | <input type="radio"/> | <input type="radio"/> | <input type="radio"/> |
| The variety of smells<br>(3)  | <input type="radio"/> | <input type="radio"/> | <input type="radio"/> |

**Q8 Please indicate how much you agree or disagree with each of the following statements. Please select one option for each statement.**

Q9 As a child (up to 12 years old) I spent a lot of time in greenspaces.

- ☐ Strongly agree (1)
- ☐ Agree (2)
- ☐ Neither agree nor disagree (3)
- ☐ Disagree (4)
- ☐ Strongly disagree (5)

Q10 As a teenager (13 to 18 years old) I spent a lot of time in greenspaces.

- ☐ Strongly agree (1)
- ☐ Agree (2)
- ☐ Neither agree nor disagree (3)
- ☐ Disagree (4)
- ☐ Strongly disagree (5)

Q11 Spending time in greenspaces is an important part of my life. By 'greenspaces' we mean all forms of living nature of flora and fauna in cities, including maintained and unmaintained environmental areas such as nature reserves, wilderness environments and urban parks.

- ☐ Strongly agree (1)
- ☐ Agree (2)
- ☐ Neither agree nor disagree (3)
- ☐ Disagree (4)
- ☐ Strongly disagree (5)

Q12 In the last 12 months, how often on average have you visited your nearby greenspace?

- ☐ Once a week or more often (1)
- ☐ 3-4 times a month (2)
- ☐ 1-2 times a month (3)
- ☐ Once every 2 to 3 months (4)
- ☐ Once or twice per year (5)
- ☐ Less often (6)
- ☐ Never (7)

Q13 How far away from your home is your nearby greenspace?

- ☐ Less than 5 minute walk (1)
- ☐ Within a 5-10 minute walk (2)
- ☐ Within an 11-20 minute walk (3)
- ☐ Within a 21-30 minute walk (4)
- ☐ More than 30 minute walk (5)
- ☐ Don't know (6)

Q14 How much do you notice the natural environments in your everyday life (please select a number)?

- ☐ A great deal 5 (1)
- ☐ 4 (2)
- ☐ Somewhat 3 (3)
- ☐ 2 (4)
- ☐ Not much 1 (5)

Q15 Do you have any difficulties being able to smell at the moment? For example, due to no sense of smell, having a cold or hay fever.

- ☐ Yes (1)
- ☐ No (2)

Q16 Do you have difficulties with your hearing at the moment? Please answer assuming you are wearing hearing aids if you need them.

☐ Yes (1)

☐ No (2)

Q17 Do you have difficulties with your sight at the moment? Please answer assuming you are wearing glasses or contact lenses if you need them.

☐ Yes (1)

☐ No (2)

Q18 The friendships and associations I have with other people in my neighbourhood mean a lot to me.

☐ Strongly agree (1)

☐ Agree (2)

☐ Neither agree nor disagree (3)

☐ Disagree (4)

☐ Strongly disagree (5)

Q19 If I needed advice about something, I could go to someone in my neighbourhood.

- ☐ Strongly agree (1)
- ☐ Agree (2)
- ☐ Neither agree nor disagree (3)
- ☐ Disagree (4)
- ☐ Strongly disagree (5)

Q20 I borrow things and exchange favours with my neighbours.

- ☐ Strongly agree (1)
- ☐ Agree (2)
- ☐ Neither agree nor disagree (3)
- ☐ Disagree (4)
- ☐ Strongly disagree (5)

Q21 I would be willing to work together with others on something to improve my neighbourhood.

- ☐ Strongly agree (1)
- ☐ Agree (2)
- ☐ Neither agree nor disagree (3)
- ☐ Disagree (4)
- ☐ Strongly disagree (5)

Q22 I plan to remain a resident of this neighbourhood for a number of years.

- ☐ Strongly agree (1)
- ☐ Agree (2)
- ☐ Neither agree nor disagree (3)
- ☐ Disagree (4)
- ☐ Strongly disagree (5)

Q23 I like to think of myself as similar to the people who live in this neighbourhood.

- ☐ Strongly agree (1)
- ☐ Agree (2)
- ☐ Neither agree nor disagree (3)
- ☐ Disagree (4)
- ☐ Strongly disagree (5)

Q24 I regularly stop and talk with people in my neighbourhood.

- ☐ Strongly agree (1)
- ☐ Agree (2)
- ☐ Neither agree nor disagree (3)
- ☐ Disagree (4)
- ☐ Strongly disagree (5)

Q25 We are interested in finding out about the kinds of physical activities that people do as part of their everyday lives. The questions will ask you about the time you spent being physically active in the **last 7 days**. Please answer each question even if you do not consider yourself to be an active person. Please think about the activities you do at work, as part of your house and yard work, to get from place to place, and in your spare time for recreation, exercise or sport.

Think about all the **vigorous** activities that you did in the **last 7 days**. **Vigorous** physical activities refer to activities that take hard physical effort and make you breathe much harder than normal. Think only about those physical activities that you did for at least 10 minutes at a time.

Q26 During the **last 7 days**, on how many days did you do **vigorous** physical activities like heavy lifting, digging, aerobics, or fast bicycling?

☐ Days per week (1) \_\_\_\_\_

☐ No vigorous activities (2)

Q27 How much time did you usually spend doing **vigorous** physical activities on one of those days?

☐ Hours per day (1) \_\_\_\_\_

☐ Minutes per day (2) \_\_\_\_\_

☐ Don't know/not sure (3)

Q28 Think about all the **moderate** activities that you did in the **last 7 days**. **Moderate** activities refer to activities that take moderate physical effort and make you breathe somewhat harder than normal. Think only about those physical activities that you did for at least 10 minutes at a time.

☐ Days per week (1) \_\_\_\_\_

☐ No moderate physical activities (2)

Q29 How much time did you usually spend doing **moderate** physical activities on one of those days?

☐ **Hours per day** (1) \_\_\_\_\_

☐ **Minutes per day** (2) \_\_\_\_\_

☐ Don't know/not sure (3)

Q30 Think about the time you spent **walking** in the **last 7 days**. This includes at work and at home, walking to travel from place to place, and any other walking that you have done solely for recreation, sport, exercise, or leisure.

Q31 During the **last 7 days**, on how many days did you **walk** for at least 10 minutes at a time?

☐ **Days per week** (1) \_\_\_\_\_

☐ No walking (2)

Q32 How much time did you usually spend **walking** on one of those days?

☐ **Hours per day** (1) \_\_\_\_\_

☐ **Minutes per day** (2) \_\_\_\_\_

☐ Don't know/not sure (3)

Q33 The last question is about the time you spent **sitting** on weekdays during the **last 7 days**. Include time spent at work, at home, while doing course work and during leisure time. This may include time spent sitting at a desk, visiting friends, reading, or sitting or lying down to watch television.

Q34 During the **last 7 days**, how much time did you spend **sitting** on a **week day**?

☐ **Hours per day** (1) \_\_\_\_\_

☐ **Minutes per day** (2) \_\_\_\_\_

☐ Don't know/not sure (3)

**Q35 Under each heading, please tick the ONE box that best describes your health TODAY.**

**Q36 Mobility**

- ☐ I have no problems in walking about (1)
- ☐ I have slight problems in walking about (2)
- ☐ I have moderate problems in walking about (3)

**Q37 Self-care**

- ☐ I have no problems washing or dressing myself (1)
- ☐ I have slight problems washing or dressing myself (2)
- ☐ I have moderate problems washing or dressing myself (3)

**Q38 Usual activities (e.g. work, study, housework, family or leisure activities)**

- ☐ I have no problems doing my usual activities (1)
- ☐ I have slight problems doing my usual activities (2)
- ☐ I have moderate problems doing my usual activities (3)

**Q39 Pain/discomfort**

- ☐ I have no pain or discomfort (1)
- ☐ I have slight pain or discomfort (2)
- ☐ I have moderate pain or discomfort (3)

**Q40 Anxiety/depression**

- ☐ I am not anxious or depressed (1)
- ☐ I am slightly anxious or depressed (2)
- ☐ I am moderately anxious or depressed (3)

**Q41** We would like to know how good or bad your health is TODAY.

This scale is numbered from 0 to 100.

100 means the best possible health you can imagine.  
0 means the worst possible health you can imagine.

Please use the scale to indicate how your health is today.

|                                                                                 |                                                                                      |
|---------------------------------------------------------------------------------|--------------------------------------------------------------------------------------|
|                                                                                 | 0    10    20    30    40    50    60    70    80    90    100                       |
| 0 = the worst health you can imagine; 100 = the best health you can imagine ( ) |  |

**Q42** Have you had heart-mind problems in the past two weeks, for example thoughts playing in your heart-mind, sadness in your heart-mind, or worry in your heart-mind?

- ☐ Yes (1)
- ☐ No (2)

**Q43** During the past two weeks, have you experienced problems in your work, taking care of yourself and your family, or in your relationship with other people because of the problems that we talked about heart-mind problems?

- ☐ Yes (1)
- ☐ No (2)

Q44 During the past two weeks, compared to other people, how much have you felt that you are not able to be happy or do not enjoy work/activities?

- ☐ Not at all (1)
- ☐ Sometimes (2)
- ☐ Usually (3)
- ☐ Always (4)

Q45 During the past two weeks, how much have you felt frustrated, despairing, or incapable of doing anything?

- ☐ Not at all (1)
- ☐ Sometimes (2)
- ☐ Usually (3)
- ☐ Always (4)

Q46 During the past two weeks, how much have you had problems with your sleep, such as not being able to sleep properly and peacefully, or feeling sleepier than before?

- ☐ Not at all (1)
- ☐ Sometimes (2)
- ☐ Usually (3)
- ☐ Always (4)

Q47 During the past two weeks, how much have you felt tired and lacking energy?

- ☐ Not at all (1)
- ☐ Sometimes (2)
- ☐ Usually (3)
- ☐ Always (4)

Q48 During the past two weeks, how much have you lost your appetite or experienced increased appetite?

- ☐ Not at all (1)
- ☐ Sometimes (2)
- ☐ Usually (3)
- ☐ Always (4)

Q49 During the past two weeks, how much have you blamed yourself for something of felt that you have let you and your family down? (For example, because of you, you and your family have lost respect in society.)

- ☐ Not at all (1)
- ☐ Sometimes (2)
- ☐ Usually (3)
- ☐ Always (4)

Q50 During the past two weeks, how much have you been having difficulty being able to focus or concentrate? (For example, not being able to concentrate while watching TV, reading newspaper, cleaning rice, cooking, cutting grass, or working.)

- ☐ Not at all (1)
- ☐ Sometimes (2)
- ☐ Usually (3)
- ☐ Always (4)

Q51 During the past two weeks, how much have people commented that you have been talking very softly, walking slowly, moving around needlessly, or acting restless?

- ☐ Not at all (1)
- ☐ Sometimes (2)
- ☐ Usually (3)
- ☐ Always (4)

Q52 During the past two weeks, how much have you had the feeling of hurting yourself, dying, or committing suicide? (For example, cutting your hands, taking poison, jumping from somewhere, hitting your head against the wall.)

- ☐ Not at all (1)
- ☐ Sometimes (2)
- ☐ Usually (3)
- ☐ Always (4)

Q53 Thank you for taking the time to complete this questionnaire. Please use the box below to provide any additional comments.

### S5. Questionnaire (Nepali version)

शहरी वातावरणले मानिसहरूको सुस्वास्थ्यलाई कसरी प्रभाव पार्छ भन्ने कुरा बुझ्नको लागि एउटा अध्ययनमा भाग लिन तपाईंलाई निमन्त्रणा गरिएको छ । यो अध्ययन बेलायतको युनिभर्सिटी अफ लिड्सका म्याक्स नवरथ, हेलेन एल्सी र मार्टिन डेलिमर र नेपालको त्रिभुवन विश्वविद्यालय काठमाडौंका मोती रिजालले गरेका हुन् । प्रश्नावली पूरा गर्न लगभग १५ मिनेट लाग्नेछ ।

यस अध्ययनमा तपाईंको सहभागिता पूर्ण रूपमा स्वैच्छिक हो र तपाईं जुन २०२२ सम्म कुनै पनि समयमा फिर्ता लिन सक्नुहुन्छ । तपाईंले नचाहेको कुनै पनि प्रश्नको उत्तर दिनुपर्दैन । हामी विश्वास गर्दछौं कि यस अध्ययन अनुसन्धानसँग सम्बन्धित कुनै ज्ञात जोखिमहरू छैनन् यद्यपि कुनै पनि अनलाइन सम्बन्धित गतिविधिसँग उल्लंघनको जोखिम सम्भव हुन्छ । यस अध्ययनमा तपाईंको सहभागिता गोप्य रहनेछ, र केवल अज्ञात तथ्यांक प्रकाशित हुनेछ । हामी नेपाल सूचना अधिकार ऐन २००७ अनुसारण गरेर कुनै पनि जोखिम कम गर्ने छौं । थप जानकारी लीड्स विश्वविद्यालयको गोपनीयता सूचना मार्फत उपलब्ध हुनेछ ।

#### Q1 अनुसन्धानमा भाग लिने सहमती

मैले सहभागीको लागि सूचना पढेको छु र बुझेका छु । मेरो सहभागिता स्वैच्छिक हो र म कुनै कारण नदिई कुनै पनि बेला पछि हट्न स्वतन्त्र छु ।

म यस अनुसन्धान परियोजनामा भाग लिन सहमत छु ।

- ☐ छु  
☐ छैन

#### Q2 तपाईंको उमेर कति हो ?

- ☐ १८ बर्ष मुनि  
☐ १८-२९  
☐ ३०-३९  
☐ ४०-४९  
☐ ५०-५९  
☐ ६०-६९  
☐ ७० बर्ष माथि

#### Q3 तपाईंको लिङ्ग कसरी वर्णन गर्नुहुन्छ ?

- ☐ पुरुष  
☐ महिला  
☐ अन्य

#### Q4 तपाईं कुन जातको हुनुहुन्छ ?

- ☐ पहाडी ब्राह्मण  
☐ पहाडी क्षेत्री  
☐ तराई ब्राह्मण/क्षेत्री  
☐ पहाडी दलित  
☐ तराई दलित  
☐ नेवार  
☐ पहाडी जनजाती  
☐ मुस्लिम  
☐ अन्य  
☐ अन्य  
☐ मलाई थाहा छैन

Q5 अब, तपाईंको परिवारमा मुख्य आय आर्जन गर्नेको बारेमा सोच्दा (जुन तपाईं वा परिवारका कोही हुन सक्नुहुन्छ) यी मध्ये कुनले मुख्य आय आर्जनकर्ताको हालको स्थिति वर्णन गर्दछ ?

- ☐ श्रम (दक्ष)
- ☐ श्रम (अदक्ष)
- ☐ सेवा (सरकारी)
- ☐ सेवा (निजी)
- ☐ सानो व्यवसाय
- ☐ व्यापार
- ☐ खेती (कृषि/पशुधन)
- ☐ गृहिणी
- ☐ विद्यार्थी
- ☐ सेवानिवृत्त (निवृत्तिभरण)
- ☐ बेरोजगार (काम गर्न सक्षम)
- ☐ बेरोजगार (काम गर्न असमर्थ)
- ☐ अन्य
- ☐ मलाई थाहा छैन

Q6 हरितस्थानमा सहरका सबै प्रकारको वनस्पति र जीवजन्तुको जीवित प्रकृतिकासाथै प्रकृतिका भण्डार संरक्षित क्षेत्रहरू र अपरिवर्तित वातावरणीय क्षेत्रहरू, उजाड वातावरण र शहरी पार्क जस्ता अज्ञात वातावरणीय क्षेत्रहरू समावेश हुन्छन् । हामी अब तपाईंलाई हरितस्थानसँग कसरी सम्बन्धित हुनुहुन्छ भन्ने बारे प्रश्नहरूको शृंखला सोध्ने छौं।

Q7 तपाईंको नजिकैको हरितस्थान के हो जस्तो लाग्छ ?

कृपया प्रत्येक तत्वको स्तर संकेत गर्नुहोस् जुन तपाईं विश्वास गर्नुहुन्छ कि हरितस्थान वर्षको यस समयमा समावेश गर्दछ । प्रति पङ्क्ति एक विकल्प चयन गर्नुहोस् ।

याद गर्नुहोस्, यहाँ कुनै सही वा गलत उत्तरहरू छैनन् ।

|                  | कम                    | मध्यम                 | उच्च                  |
|------------------|-----------------------|-----------------------|-----------------------|
| ध्वनि को विविधता | <input type="radio"/> | <input type="radio"/> | <input type="radio"/> |
| रंगहरूको विविधता | <input type="radio"/> | <input type="radio"/> | <input type="radio"/> |
| गन्धको विविधता   | <input type="radio"/> | <input type="radio"/> | <input type="radio"/> |

Q8 कृपया तलका प्रत्येक कथनसँग तपाईं कति सहमत हुनुहुन्छ वा असहमत हुनुहुन्छ संकेत गर्नुहोस् । कृपया प्रत्येक कथनको लागि एक विकल्प चयन गर्नुहोस् ।

Q9 बालापनमा (१२ बर्ष उमेर सम्म) मैले ग्रीनस्पेसमा धेरै समय खर्च गरे ।

- ☐ दृढ रूपमा सहमत
- ☐ सहमत
- ☐ न त सहमत छ न असहमत
- ☐ असहमत
- ☐ दृढ असहमत

Q10 किशोरावस्थामा (१३ देखि १८ ) मैले हरितस्थानमा धेरै समय खर्च गरे ।

- ☐ दृढ रूपमा सहमत
- ☐ सहमत

- ☐ न त सहमत छ न असहमत
- ☐ असहमत
- ☐ दृढ असहमत

**Q11 हरितस्थानमा समय खर्च गर्नु मेरो जीवनको महत्त्वपूर्ण अंश हो । हरितस्थानबाट हामी शहरहरूमा वनस्पति र जीवजन्तुको सबै प्रकारका जीवित प्रकृतिहरू, प्रकृति भण्डार, उजाड वातावरण र शहरी पार्कहरू जस्ता वातावरणीय क्षेत्रहरू सहित राखिएको र अव्यवस्थित वातावरणीय क्षेत्रहरू समावेश गर्दछौं ।**

- ☐ दृढ रूपमा सहमत
- ☐ सहमत
- ☐ न त सहमत छ न असहमत
- ☐ असहमत
- ☐ दृढ असहमत

**Q12 पछिल्ला १२ महिनामा औसतमा तपाईंले कति पटक आफ्नो नजिकको हरितस्थान भ्रमण गर्नुभयो ?**

- ☐ एक महिनामा ३-४ पटक
- ☐ एक महिनामा १-२ पटक
- ☐ प्रत्येक २ देखि ३ महिनामा एक पटक
- ☐ प्रति वर्ष एक वा दुई पटक
- ☐ अक्सर कम
- ☐ कहिले पनि

**Q13 तपाईंको घरबाट हरितस्थान कति टाढा छ ?**

- ☐ ५ देखि १० मिनेट भित्र पैदल
- ☐ ११ देखि २० मिनेट भित्र पैदल
- ☐ २१ देखि ३० मिनेट भित्र पैदल
- ☐ ३० मिनेट भन्दा ब
- ☐ ढी पैदल
- ☐ मलाई थाहा छैन।

**Q14 तपाईंको दैनिक जीवनमा प्राकृतिक वातावरण कति याद गर्नुहुन्छ (कृपया एउटा नम्बर चयन गर्नुहोस्) ?**

- ☐ (५) धेरै
- ☐ (४)
- ☐ केहि (३)
- ☐ (२)
- ☐ त्यति छैन (१)

**Q15 के तपाईंलाई यस समयमा सुँघ्न कुनै कठिनाइहरू छन् ? उदाहरण को लागी, गन्ध थाहा नहुने कारण, चिसो लाग्नु वा ज्वरो आउनु ।**

- ☐ छु
- ☐ छैन

**Q16 के तपाईंलाई यस समयमा सुनाइ मा कठिनाइहरू छन् ? कृपया तपाईंले श्रवण यन्त्रहरू लगाइरहनुभएको छ भनी मानेर जवाफ दिनुहोस्।**

- ☐ छु
- ☐ छैन

**Q17 के तपाईंलाई अहिले देखलाई कठिनाइ छ ? कृपया तपाईंले चशमा वा कन्ट्याक्ट लेन्स लगाउनुभएको छ भनी मानेर जवाफ दिनुहोस् यदि तपाईंलाई ती चाहिन्छ भने ।**

- ☐ छु
- ☐ छैन

**Q18 अब, हामी तपाईंलाई तपाईंको छिमेकीका मानिसहरूसँग कसरी सम्बन्ध राख्नुहुन्छ भन्ने बारे प्रश्नहरूको शृंखला सोध्ने छौं ।**

**मेरो छिमेकका अन्य मानिसहरूसँगको मित्रता र संगत मेरो लागि धेरै अर्थपूर्ण छ ।**

- ☐ पूर्ण सहमत
- ☐ सहमत
- ☐ अनिर्णित
- ☐ असहमत
- ☐ कडा रूपमा असहमत

**Q19 यदि मलाई कुनै कुराको बारेमा सल्लाह चाहिन्छ भने, म मेरो छिमेकिकोमा जान सक्छु ।**

- ☐ पूर्ण सहमत
- ☐ सहमत
- ☐ अनिर्णित
- ☐ असहमत
- ☐ कडा रूपमा असहमत

**Q20 म मेरो छिमेकीहरूसँग बाट चिजहरू सापटी र सहयोग आदानप्रदान गर्छु ।**

- ☐ पूर्ण सहमत
- ☐ सहमत
- ☐ अनिर्णित
- ☐ असहमत
- ☐ कडा रूपमा असहमत

**Q21 म मेरो छिमेकको सुधारको लागि अरु संग केहि काम गर्न इच्छुक छु ।**

- ☐ पूर्ण सहमत
- ☐ सहमत
- ☐ अनिर्णित
- ☐ असहमत
- ☐ कडा रूपमा असहमत

**Q22 म मेरो छिमेकको सुधारको लागि अरु संग केहि काम गर्न इच्छुक छु ।**

- ☐ पूर्ण सहमत
- ☐ सहमत
- ☐ अनिर्णित
- ☐ असहमत
- ☐ कडा रूपमा असहमत

**Q23 म आफूलाई यो छिमेकमा बस्ने मानिसहरू जस्तै सोच्दछु ।**

- ☐ पूर्ण सहमत
- ☐ सहमत
- ☐ अनिर्णित
- ☐ असहमत
- ☐ कडा रूपमा असहमत

**Q24 म नियमित रूपमा रोकिएर छिमेकमा बस्ने व्यक्तिहरूसँग कुरा गर्छु ।**

- ☐ पूर्ण सहमत

- ☐ सहमत
- ☐ अनिर्णित
- ☐ असहमत
- ☐ कडा रूपमा असहमत

Q25 हामी मानिसहरूले दैनिक रूपमा गर्ने शारीरिक अभ्यासहरूको बारेमा बुझ्न इच्छुक छौं। यी प्रश्नहरूले तपाईंलाई पछिल्लो ७ दिनमा शारीरिक रूपमा सक्रिय हुनुभएको समयको बारेमा सोध्नेछ हुनुहुन्न भने पनि कृपया प्रत्येक प्रश्नको उत्तर दिनुहोस् । कृपया तपाईंले काममा गर्ने गतिविधिहरूको बारेमा सोच्नुहोस्, तपाईंको घरआँगनको कामको एक भागको रूपमा, ठाउँ-ठाउँमा जानको लागि, र तपाईंको खाली समयमा गर्ने मनोरञ्जन, व्यायाम वा खेलको बारेमा सोच्नुहोस् ।

पछिल्लो ७ दिनमा तपाईंले गर्नुभएका सबै जोरदार गतिविधिहरूको बारेमा सोच्नुहोस्। जोरदार शारीरिक गतिविधिहरू भन्नाले कडा शारीरिक प्रयास लिने र तपाईंलाई सामान्य भन्दा धेरै सास फेर्न बनाउने गतिविधिहरूलाई जनाउँछ। ती शारीरिक गतिविधिहरूको बारेमा मात्र सोच्नुहोस् जुन तपाईंले कम्तिमा १० मिनेट गर्नुभयो ।

Q26 पछिल्लो ७ दिनहरूमा, तपाईंले कति दिनसम्म जोरदार शारीरिक गतिविधिहरू गर्नुभयो जस्तै भारी बोक्ने, उचाल्ने खन्ने, एरोबिक्स, वा द्रुत साइकल चलाउनुभयो ?

- ☐ प्रति हप्ता दिन \_\_\_\_\_
- ☐ कुनै जोरदार गतिविधिहरू गरिन

Q27 ती दिनहरू मध्ये कुनै एक दिनमा प्राय तपाईंले जोरदार शारीरिक गतिविधिहरू गर्न कति समय खर्च गर्नुभयो ?

- घण्टा/मिनेट
- ☐ प्रति दिन घण्टा \_\_\_\_\_
  - ☐ मिनेट प्रति दिन \_\_\_\_\_
  - ☐ कुनै जोरदार गतिविधिहरू गरिन

Q28 पछिल्लो ७ दिनमा तपाईंले गर्नुभएका सबै मध्यम गतिविधिहरूको बारेमा सोच्नुहोस् । मध्यम गतिविधिहरूले त्यस्ता गतिविधिहरूलाई जनाउँदछ जुनले मध्यम शारीरिक प्रयास लिन्छ र तपाईंलाई सामान्य भन्दा केही कडा सास फेर्न दिन्छ । ती शारीरिक गतिविधिहरूको बारेमा मात्र सोच्नुहोस् जुन तपाईंले कम्तिमा १० मिनेट गर्नुभयो ।

- दिन प्रति हप्ता&
- ☐ दिन प्रति हप्ता \_\_\_\_\_
  - ☐ कुनै मध्यम शारीरिक गतिविधिहरू गरिन

Q29 ती दिनहरू मध्येमा तपाईंले मध्यम शारीरिक गतिविधिहरू गर्न कति समय खर्च गर्नुभयो ?

- ☐ प्रति दिन घण्टा \_\_\_\_\_
- ☐ प्रति दिन मिनेट \_\_\_\_\_
- ☐ कुनै मध्यम शारीरिक गतिविधिहरू गरिन

Q30 पछिल्लो ७ दिनमा तपाईंले हिंड्नु भएको समयको बारेमा सोच्नुहोस् । यसमा तपाईं काममा र घरमा हुँदा , ठाउँ-ठाउँमा यात्रा गर्न हिंड्ने, र कुनै अन्य हिंड्ने काम गर्दा र तपाईंले मात्र मनोरञ्जन, खेल, व्यायाम, वा फुर्सतको लागि गर्नुभयो ।

Q31 पछिल्लो ७ दिनहरूमा, एक पटकमा कम्तिमा १० मिनेट कति दिन हिंड्नुभयो ?

- दिन प्रति हप्ता& nbsp;
- ☐ दिन प्रति हप्ता \_\_\_\_\_
  - ☐ हिंड्दै छैन

Q32 तपाईं सामान्यतया ती दिनहरूमा हिंड्न कति समय खर्च गर्नुभयो ?

- ☐ प्रति दिन घण्टा \_\_\_\_\_
- ☐ प्रति दिन मिनेट \_\_\_\_\_
- ☐ हिड्दै छैन

**Q33 अन्तिम प्रश्न भने तपाईंले पछिल्लो ७ दिनमा, हप्ताको काम गर्ने दिनहरूमा बिताएका समयको बारेमा हो । काममा, घरमा, नियमित काम गर्दा र फुर्सदको समयमा बिताएको समय समावेश गर्नुहोस् । यसमा डेस्कमा बसेर, साथीहरू भेट्न, पढ्न, वा बसेर वा टेलिभिजन हेर्दा बिताएको समय समावेश हुन सक्छ ।**

**Q34 पछिल्लो ७ दिनहरूमा, तपाईंले एक हप्तामा कति समय बसेर बिताउनुभयो ?**

- ☐ प्रति दिन घण्टा \_\_\_\_\_
- ☐ प्रति दिन मिनेट \_\_\_\_\_
- ☐ थाहा छैन/निश्चित छैन

**Q35 तल दिईएका प्रत्येक समूहमा, कृपया आजको दिन तपाईंको स्वास्थ्य स्थितिलाई सबभन्दा रामरी वर्णन गर्ने एउटा कोठामा ठीक चिन्ह लगाउनुहोस् ।**

**Q36 हिँडडुल**

- ☐ मलाई यता उता हिँड्न कुनै समस्याहरू छैनन्
- ☐ मलाई यता उता हिँड्न केही समस्याहरू छन्
- ☐ म ओछ्यानमै थलिएको छु

**Q37 आफ्नो-हेरचाह**

- ☐ मलाई आफ्नो-हेरचाह गर्न कुनै समस्याहरू छैनन्
- ☐ मलाई आफैँ नुहाउन वा लुगा लगाउन केही समस्याहरू छन्
- ☐ म आफैँ नुहाउन वा लुगा लगाउन असमर्थ छु

**Q38 सामान्य वा नियमित क्रियाकलापहरू (जस्तै: रोजगार सम्बन्धी, अध्ययन, घरको काम, परिवार वा फुर्सदको क्रियाकलापहरू)**

- ☐ मलाई आफ्नो सामान्य वा नियमित क्रियाकलापहरू गर्न कुनै समस्याहरू छैनन्
- ☐ मलाई आफ्नो सामान्य वा नियमित क्रियाकलापहरू गर्न केही समस्याहरू छन्
- ☐ म आफ्नो सामान्य वा नियमित क्रियाकलापहरू गर्न असमर्थ छु

**Q39 दुखाइ / असुविधा**

- ☐ मलाई कुनै दुखाइ वा असुविधा छैन
- ☐ मलाई मध्यम दुखाइ वा असुविधा छ
- ☐ मलाई अति कडा दुखाइ वा असुविधा छ

**Q40 चिन्ता / उदासीपन**

- ☐ म चिन्तित वा उदास छैन
- ☐ म मध्यम रूपमा चिन्तित वा उदास छु
- ☐ म मध्यम रूपमा चिन्तित वा उदास छु

**Q41 मानिसहरूलाई आफ्नो स्वास्थ्य स्थिति कतिको राम्रो वा नराम्रो छ भनेर बताउनको लागि मद्दत गर्न, हामीले एउटा स्केल (थर्मोमिटर जस्तै) कोरेका छौं जसमा तपाईंले कल्पना गर्न सक्ने सबैभन्दा राम्रो स्थितिलाई 100 नम्बर दिईएको छ र तपाईंले कल्पना गर्न सक्ने सबैभन्दा नराम्रो स्थितिलाई 0 नम्बर दिईएको छ ।**

हामी तपाईंले तपाईंको विचारमा आजको दिन तपाईंको आफ्नो स्वास्थ्य कतिको राम्रो वा नराम्रो छ भनेर यो स्केलमा देखाउनुहोस् भन्ने चाहन्छौं । यसो गर्नलाई कृपया तपाईंले आजको दिन आफ्नो स्वास्थ्य स्थिति कतिको राम्रो वा नराम्रो छ भनेर स्केलमा देखाउने बिन्दुसम्म तल दिईएको बाकसबाट एउटा रेखा कोर्नुहोस् ।

आज तपाईंको आफ्नो स्वास्थ्य स्थिति \_\_\_\_\_

Q42 अब हामी तपाईंलाई ई गएको २ हप्तामा एक दुई दिनमात्रै नभएर लगातार धेरै दिनसम्म मन दुःखी भईरहने, खिन्न लागिरहने वा नरमाईलो लागिरहने भएको थियो कि थिएन भन्ने वारेमा कुरा गर्छौं ।

Q43 तपाईंलाई विगतको २ हप्तामा मनसँग सम्बन्धित कुन समस्याहरु आएको थियो? जस्तै मनै मा कुरा खेली रहने, मन दुखी भईरहने अथवा मनमा चिन्ता लागी रहने ?

- ☐ थिया
- ☐ थिएन

Q44 गएको २ हप्तामा भर्खरै हामीले कुरा गरेको मन सँग सम्बन्धित समस्याहरुको कारणले तपाईंलाई आफ्नो काम, आफ्नो साथै घरपरिवारको हेरचाह र अरु मानिसहरूसँगको तपाईंको सम्बन्धमा कतिका असर पारेको थियो?

- ☐ थिया
- ☐ थिएन

Q45 गएका २ हप्तामा तपाईं अन्य व्यक्तिहरु जति रमाउँछन्, त्यतिको रमाउन नसक्ने/खुसीहुन नसक्ने वा काम गर्न मन नलाग्ने कतिको भएको थियो ?

- ☐ पटकै होइन
- ☐ कहिलेकाहीँ
- ☐ सामान्यतया
- ☐ सधैं

Q46 गएका २ हप्तामा तपाईं, दिक्क, निरासले केही गर्न सक्नुहुन्थ्यो जस्तो लाग्न थाल्यो ?

- ☐ पटकै होइन
- ☐ कहिलेकाहीँ
- ☐ सामान्यतया
- ☐ सधैं

Q47 गएका २ हप्तामा तपाईं रामरी सुत्न नसक्ने वा निन्द्रा मस्त नआउने वा अधिपछि भन्दा धेरै सुत्ने वा धेरै निन्द्रा लाग्ने कतिको भएको थियो ?

- ☐ पटकै होइन
- ☐ कहिलेकाहीँ
- ☐ सामान्यतया
- ☐ सधैं

Q48 गएका दुई हप्तामा तपाईंको थकान महशुस हुनेछ, शक्ति वागत कमि कतिको महशुस हुनेछ ?

- ☐ पटकै होइन
- ☐ कहिलेकाहीँ
- ☐ सामान्यतया
- ☐ सधैं

Q49 गएका २ हप्तामा तपाईंलाई खानाखान मन नलाग्ने वा रुचि नहुने वा अधिपछि भन्दा धेरै खान मन लाग्न कतिको भएको थियो ?

- ☐ पटककै होइन
- ☐ कहिलेकाहीँ
- ☐ सामान्यतया
- ☐ सधैं

Q50 गएका २ हप्तामा तपाईं आफूले आफूलाई दोषी ठान्ने वा आफ्नो कारणले गर्दा आफू असफल भएको वा परिवार तल परेको कतिको महशुस गर्नु भएको थियो ? (जस्तै: आफ्नो कारणले गर्दा समदु यमा आफ्नो तथा आफ्नो परिवारको ईज्जत गुमेको महशुस गर्ने )

- ☐ पटककै होइन
- ☐ कहिलेकाहीँ
- ☐ सामान्यतया
- ☐ सधैं

Q51 गएका २ हप्तामा तपाईंलाई ध्यान केन्द्रित गर्न वा एक चित्त हुन वा एक सुरले काम गर्न गाह्रो हुने कतिको भएको थियो ? (जस्तै: पत्रपत्रिका पढ्न वा टी.भी. हेर्न, चामल केलाउन, पात गाँस्न, तरकारी पकाउन, घाँस काट्न, ध्यान दिएर कुन पनि काम गर्न आदि)

- ☐ पटककै होइन
- ☐ कहिलेकाहीँ
- ☐ सामान्यतया
- ☐ सधैं

Q52 गएको २ हप्तामा अरु व्यक्तिले पनि याद गर्ने गरी तपाईं बिस्तारै बोल्ने वाहिङ्ने गर्नुभएको अथवा छट्पट्टीभएर चाहिने भन्दा बढी हिँडडुल गर्ने कतिको गर्नुभएको थियो ?

- ☐ पटककै होइन
- ☐ कहिलेकाहीँ
- ☐ सामान्यतया
- ☐ सधैं

Q53 गएको २ हप्तामा तपाईंलाई मरौं मरौं जस्तो लाग्ने, आफ्नो ज्यान आफैँ लिने वा आत्महत्या गर्ने खालका विचारहरू कतिको आयो ? (जस्तै: हातकाट्ने, विष सेवन गर्ने, हामफाल्ने, भितामाटाउको ठोक्काउने आदि)

- ☐ पटककै होइन
- ☐ कहिलेकाहीँ
- ☐ सामान्यतया
- ☐ सधैं

यो प्रश्नावली पूरा गर्न समय दिनुभएकोमा धन्यवाद। कृपया कुनै पनि थप टिप्पणीहरू प्रदान गर्न तलको बाकस प्रयोग गर्नुहोस्।
